# Supplementary material
Source: Elsevier journal article supplement (http://www.leonmillerco.com/soilreports/MMC46.pdf)
Supplement: MMC46 [file MMC46.pdf]

Map Unit Name—Maries County, Missouri  
(MMC45)

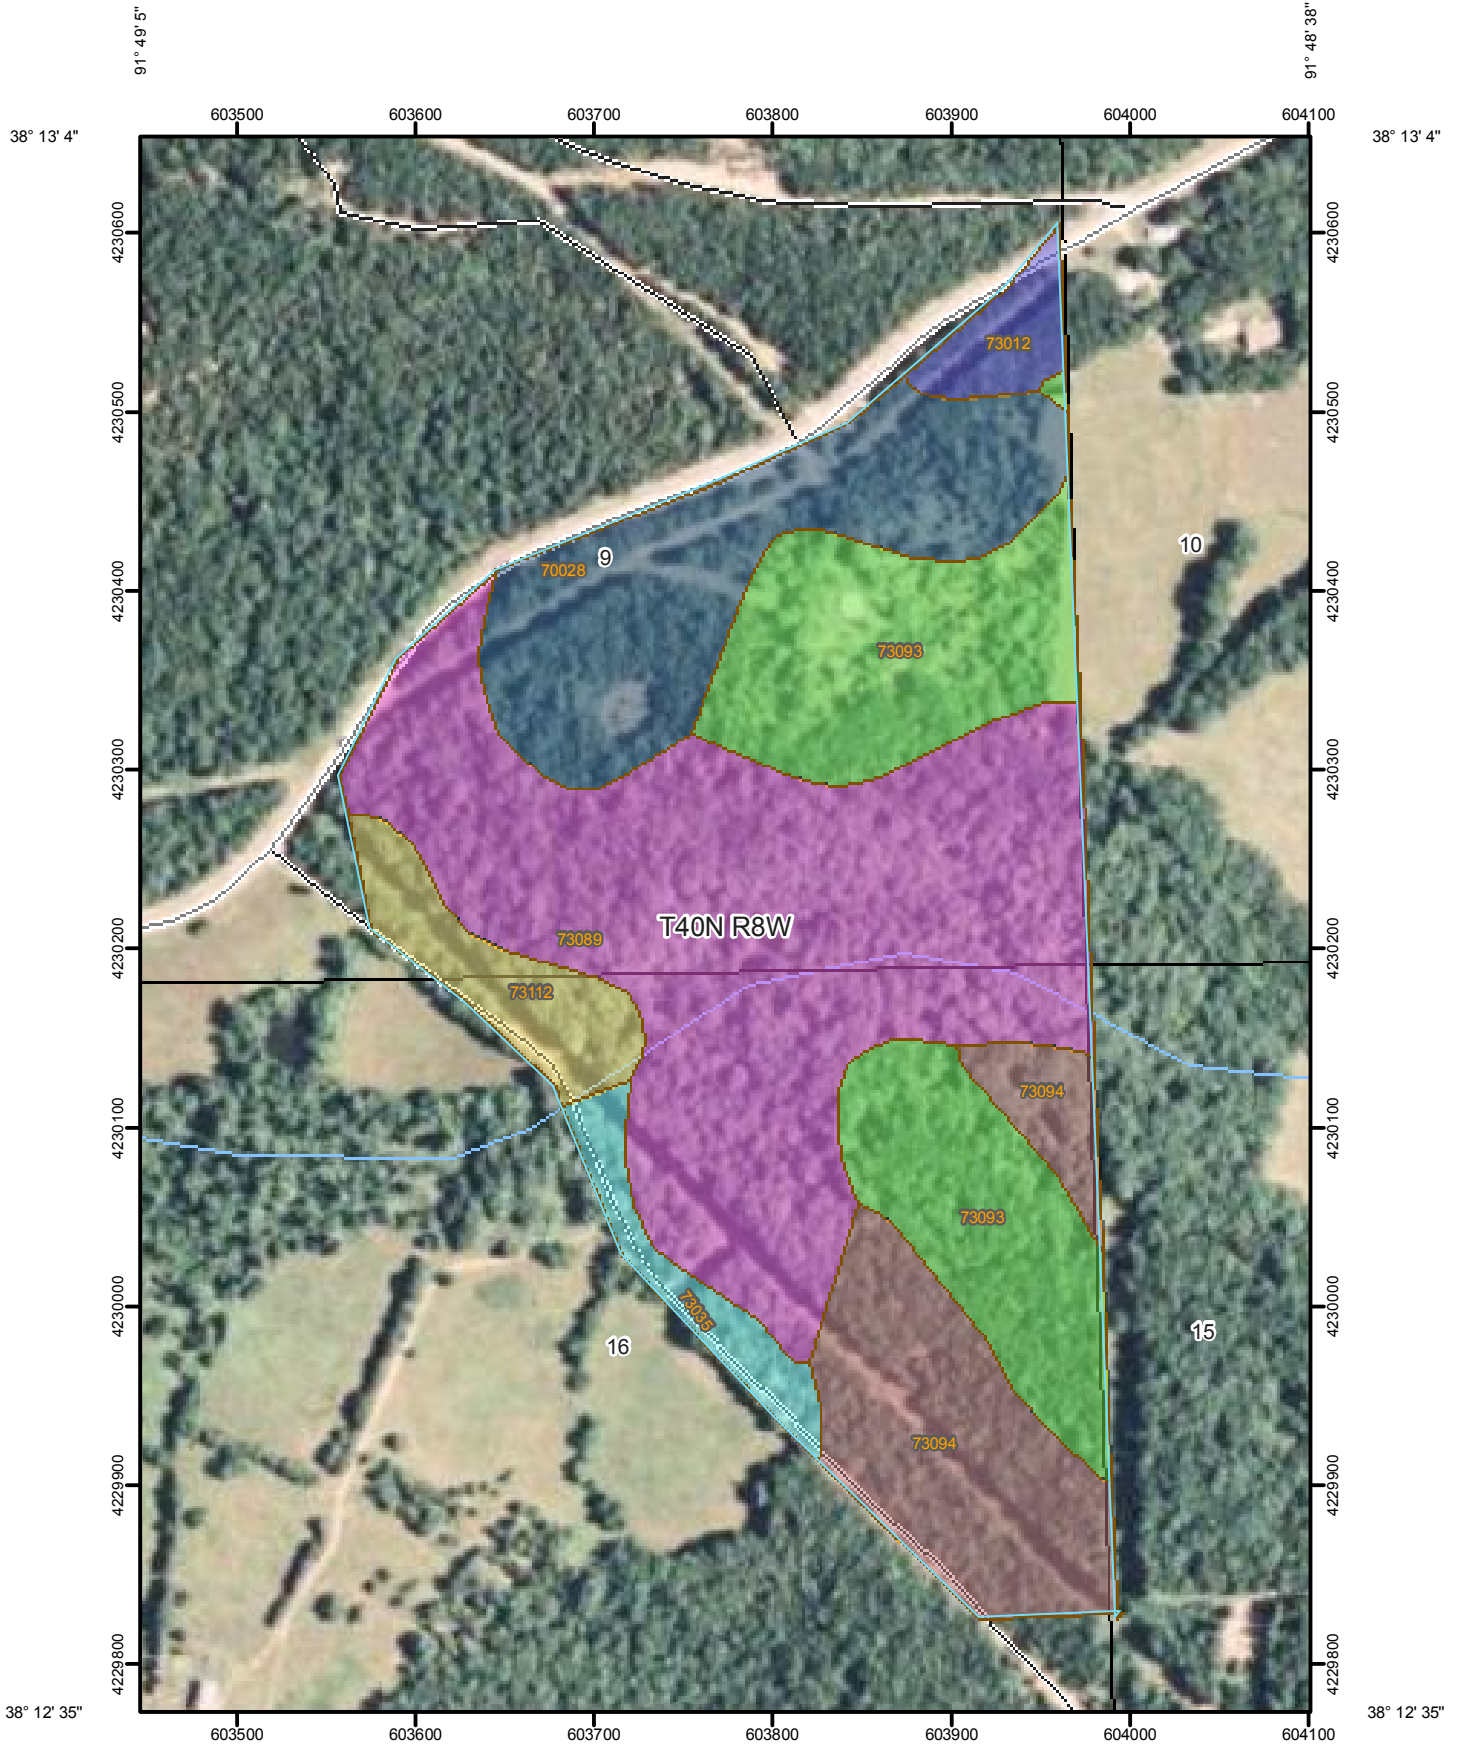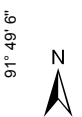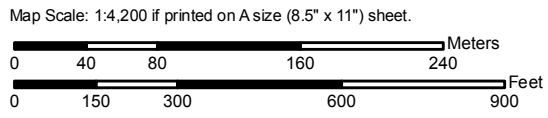

## MAP LEGEND

### Area of Interest (AOI)

 Area of Interest (AOI)

### Soils

 Soil Map Units

### Soil Ratings

 Gatewood very gravelly silt loam, 15 to 35 percent slopes, stony

 Gatewood very gravelly silt loam, 8 to 15 percent slopes, stony

 Gravois silt loam, 3 to 8 percent slopes

 Gravois silt loam, 8 to 15 percent slopes

 Gunlock silt loam, 3 to 8 percent slopes

 Moko-Rock outcrop complex, 3 to 15 percent slopes, very stony

 Rueter very gravelly silt loam, 15 to 35 percent slopes, very stony

 Not rated or not available

### Political Features

 Cities

 PLSS Township and Range

 PLSS Section

### Water Features

 Oceans

 Streams and Canals

### Transportation

 Rails

 Interstate Highways

 US Routes

 Major Roads

 Local Roads

## MAP INFORMATION

Map Scale: 1:4,200 if printed on A size (8.5" × 11") sheet.

The soil surveys that comprise your AOI were mapped at 1:24,000.

Please rely on the bar scale on each map sheet for accurate map measurements.

Source of Map: Natural Resources Conservation Service  
Web Soil Survey URL: <http://websoilsurvey.nrcs.usda.gov>  
Coordinate System: UTM Zone 15N NAD83

This product is generated from the USDA-NRCS certified data as of the version date(s) listed below.

Soil Survey Area: Maries County, Missouri  
Survey Area Data: Version 10, Jun 4, 2009

Date(s) aerial images were photographed: 7/6/2007

The orthophoto or other base map on which the soil lines were compiled and digitized probably differs from the background imagery displayed on these maps. As a result, some minor shifting of map unit boundaries may be evident.

## Map Unit Name

| Map Unit Name— Summary by Map Unit — Maries County, Missouri |                                                                     |                                                                     |              |                |
|--------------------------------------------------------------|---------------------------------------------------------------------|---------------------------------------------------------------------|--------------|----------------|
| Map unit symbol                                              | Map unit name                                                       | Rating                                                              | Acres in AOI | Percent of AOI |
| 70028                                                        | Moko-Rock outcrop complex, 3 to 15 percent slopes, very stony       | Moko-Rock outcrop complex, 3 to 15 percent slopes, very stony       | 7.6          | 15.7%          |
| 73012                                                        | Gravois silt loam, 3 to 8 percent slopes                            | Gravois silt loam, 3 to 8 percent slopes                            | 1.1          | 2.2%           |
| 73035                                                        | Gravois silt loam, 8 to 15 percent slopes                           | Gravois silt loam, 8 to 15 percent slopes                           | 1.4          | 3.0%           |
| 73089                                                        | Rueter very gravelly silt loam, 15 to 35 percent slopes, very stony | Rueter very gravelly silt loam, 15 to 35 percent slopes, very stony | 19.1         | 39.5%          |
| 73093                                                        | Gatewood very gravelly silt loam, 8 to 15 percent slopes, stony     | Gatewood very gravelly silt loam, 8 to 15 percent slopes, stony     | 10.4         | 21.5%          |
| 73094                                                        | Gatewood very gravelly silt loam, 15 to 35 percent slopes, stony    | Gatewood very gravelly silt loam, 15 to 35 percent slopes, stony    | 6.6          | 13.5%          |
| 73112                                                        | Gunlock silt loam, 3 to 8 percent slopes                            | Gunlock silt loam, 3 to 8 percent slopes                            | 2.3          | 4.7%           |
| <b>Totals for Area of Interest</b>                           |                                                                     |                                                                     | <b>48.4</b>  | <b>100.0%</b>  |

## Description

A soil map unit is a collection of soil areas or nonsoil areas (miscellaneous areas) delineated in a soil survey. Each map unit is given a name that uniquely identifies the unit in a particular soil survey area.

## Rating Options

*Aggregation Method:* No Aggregation Necessary

*Tie-break Rule:* Lower
